# Supplementary material for: Therapeutic effects of the euglenoid ichthyotoxin, euglenophycin, in colon cancer
Source: PubMed Central journal article supplement (PMC5732811; doi:10.18632/oncotarget.22238), 2017-11-01
Supplement: oncotarget-08-104347-s001.pdf [file oncotarget-08-104347-s001.pdf]

## Therapeutic effects of the euglenoid ichthyotoxin, euglenophycin, in colon cancer

### SUPPLEMENTARY MATERIALS

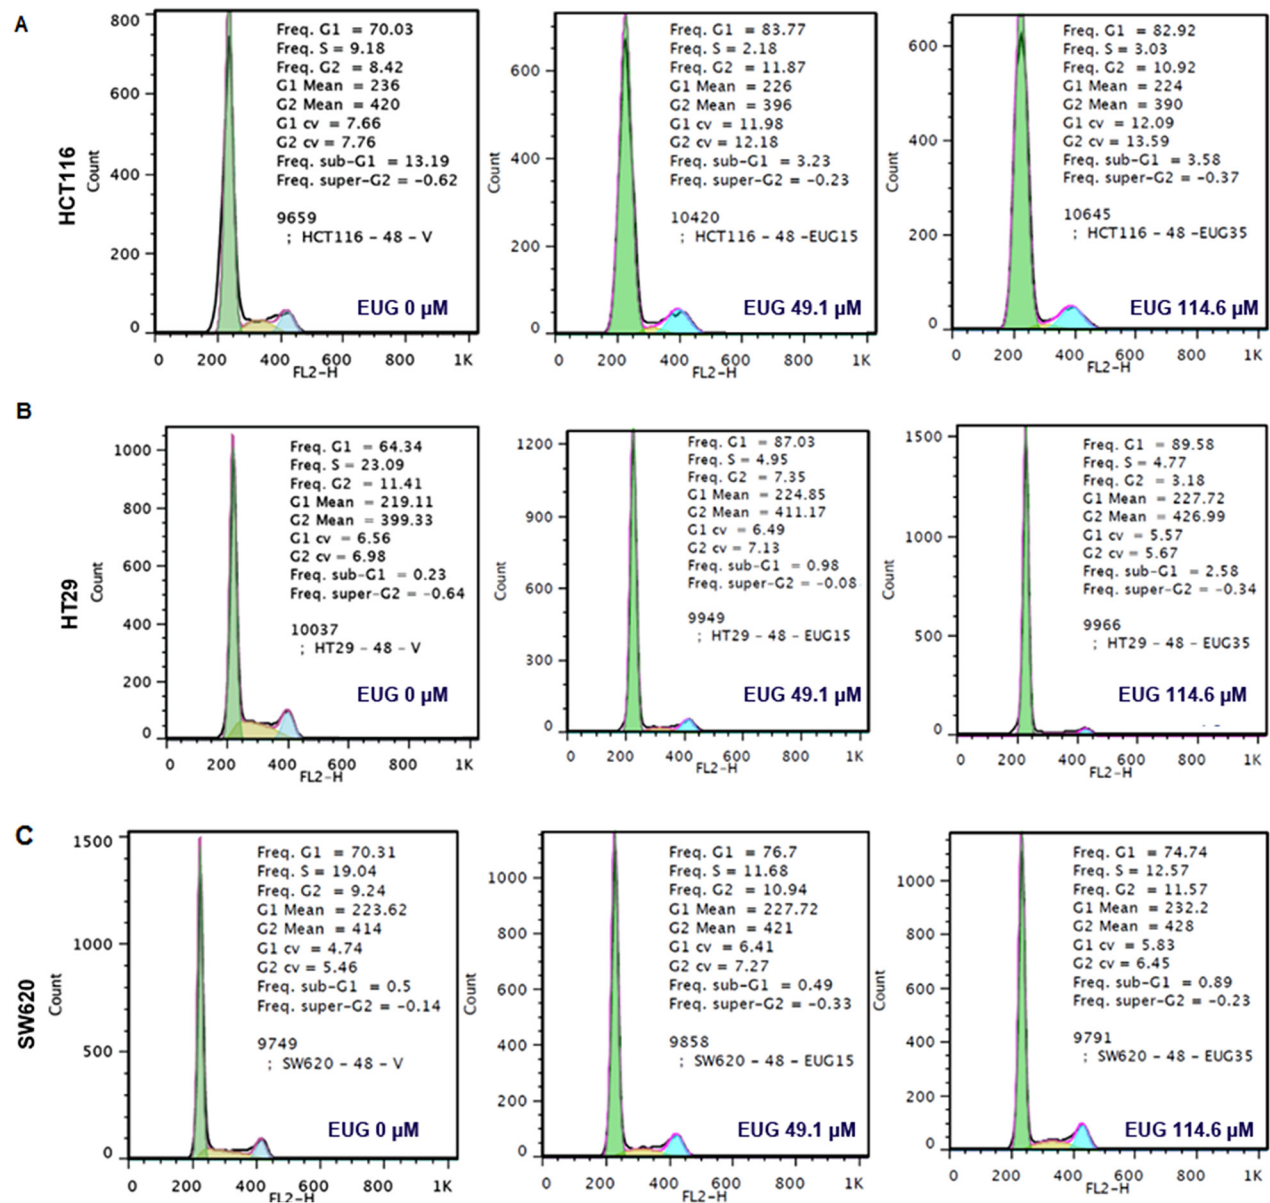

**Supplementary Figure 1:** Cell cycle analysis representative histograms of (A), HCT116; (B), HT29; (C), SW620 cells treated with euglenophycin.

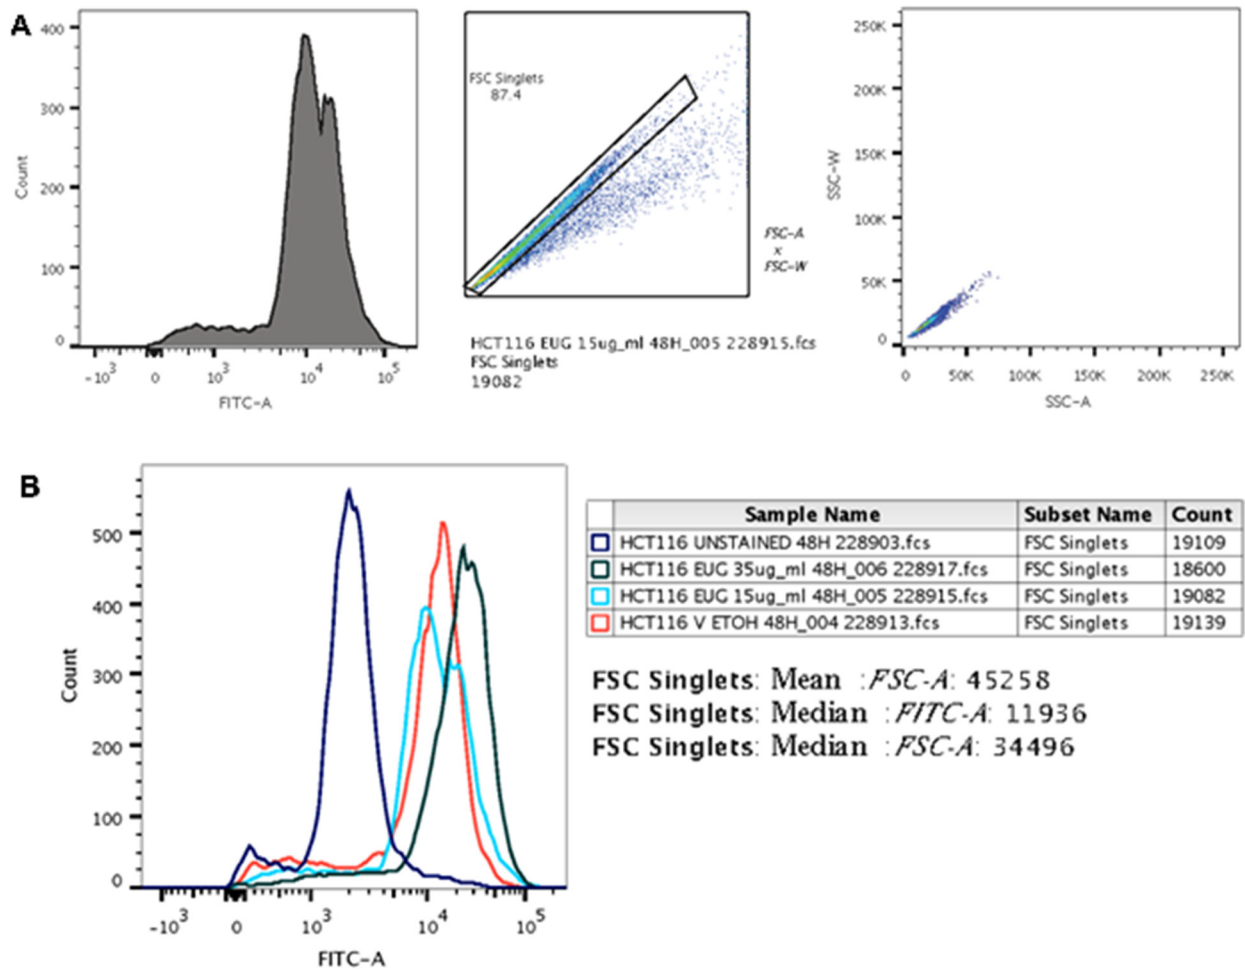

**Supplementary Figure 2: Detection of autophagic flux.** (A), Representative gating and doublet discrimination strategy in detection of autophagic flux using CYTO-ID kit and flow-cytometry; (B), histogram and quantification using cell count and median fluorescence.

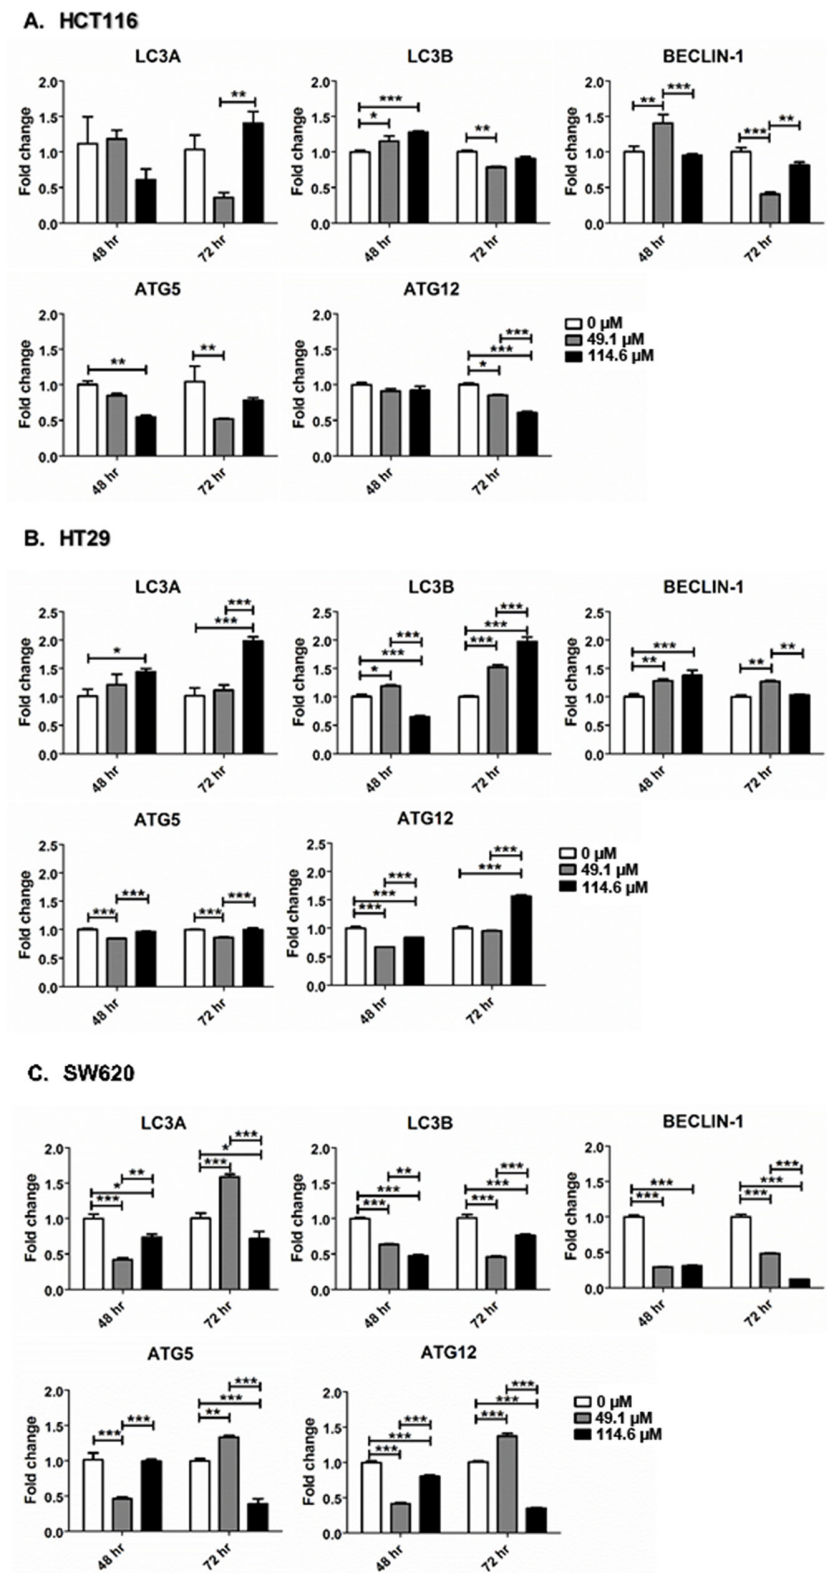

**Supplementary Figure 3:** qRT-PCR of autophagy markers in (A) HCT116; (B), HT29; and (C), SW620 cells treated with eugenophycin. Values indicate + SE from three independent experiments.

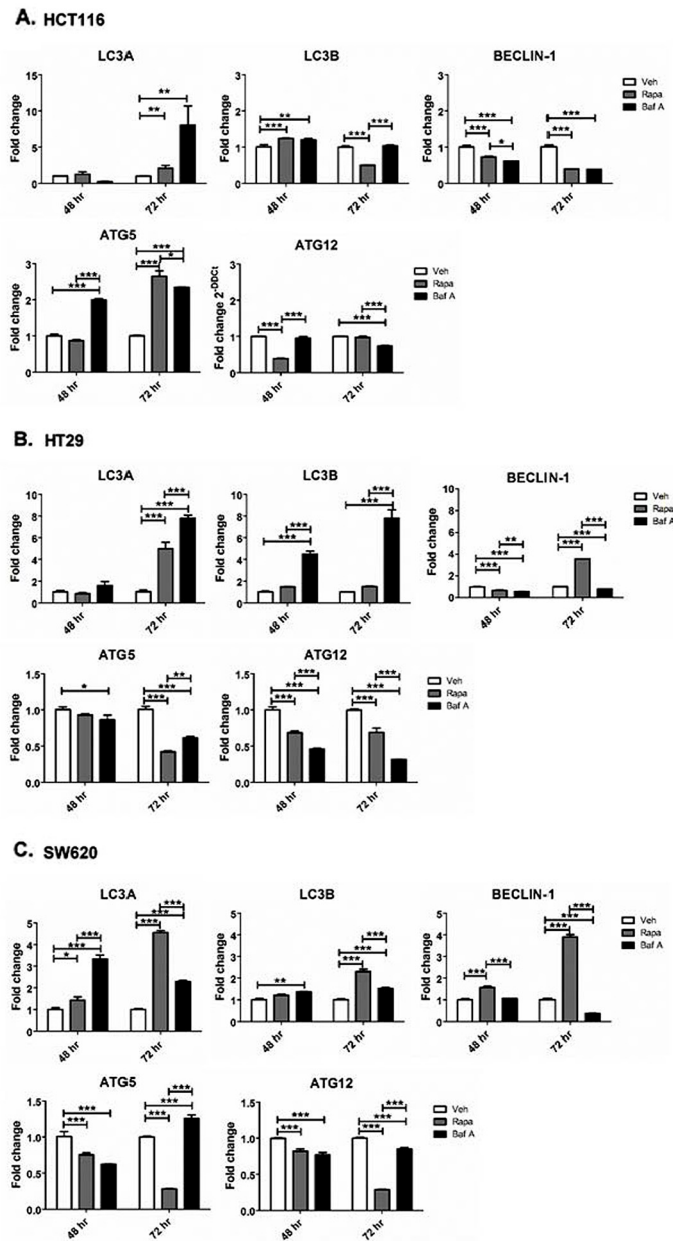

**Supplementary Figure 4:** qRT-PCR of autophagy markers in (A), HCT116; (B), HT29; and (C), SW620 cells treated with rapamycin (Rapa) or Bafilomycin A (Baf A). Values indicate + SE from three independent experiments.

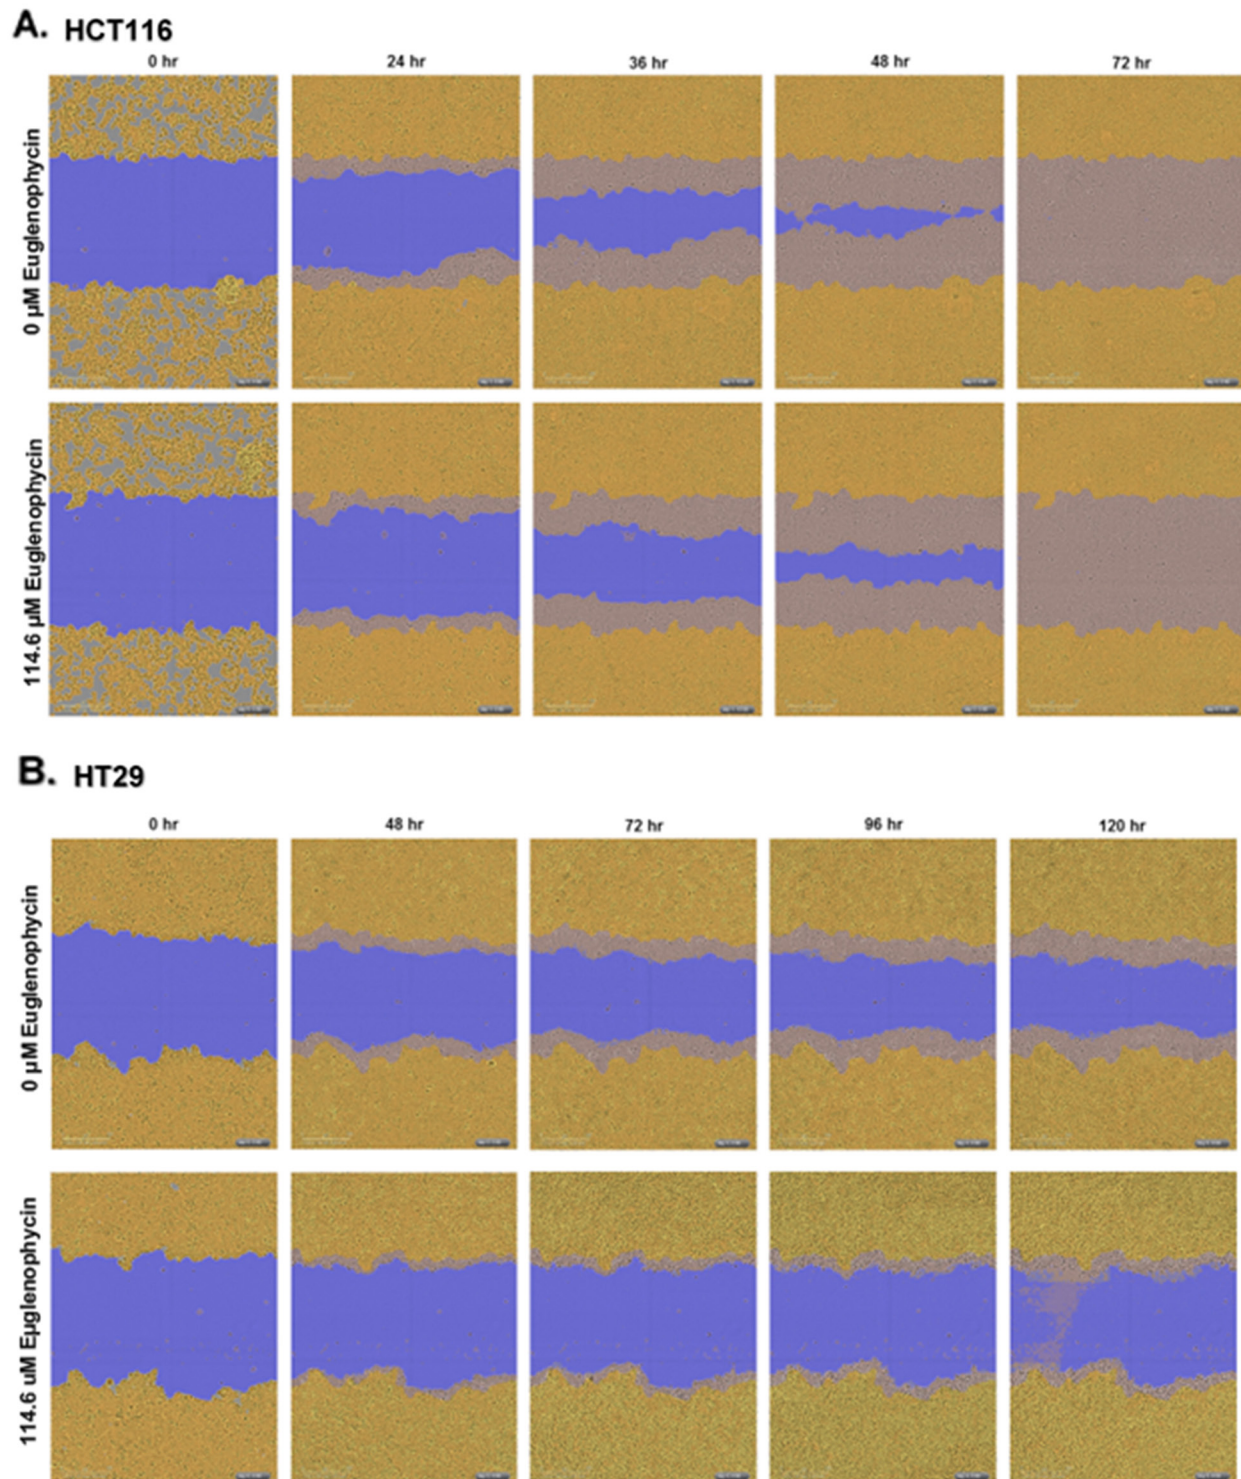

**Supplementary Figure 5:** Scratch assay representative images of (A), HCT116 and (B), HT29 cells. Regions are color coded as follows: wound area (blue), non-migrating cells (golden yellow), migrating cells that populate the wound (light brown).

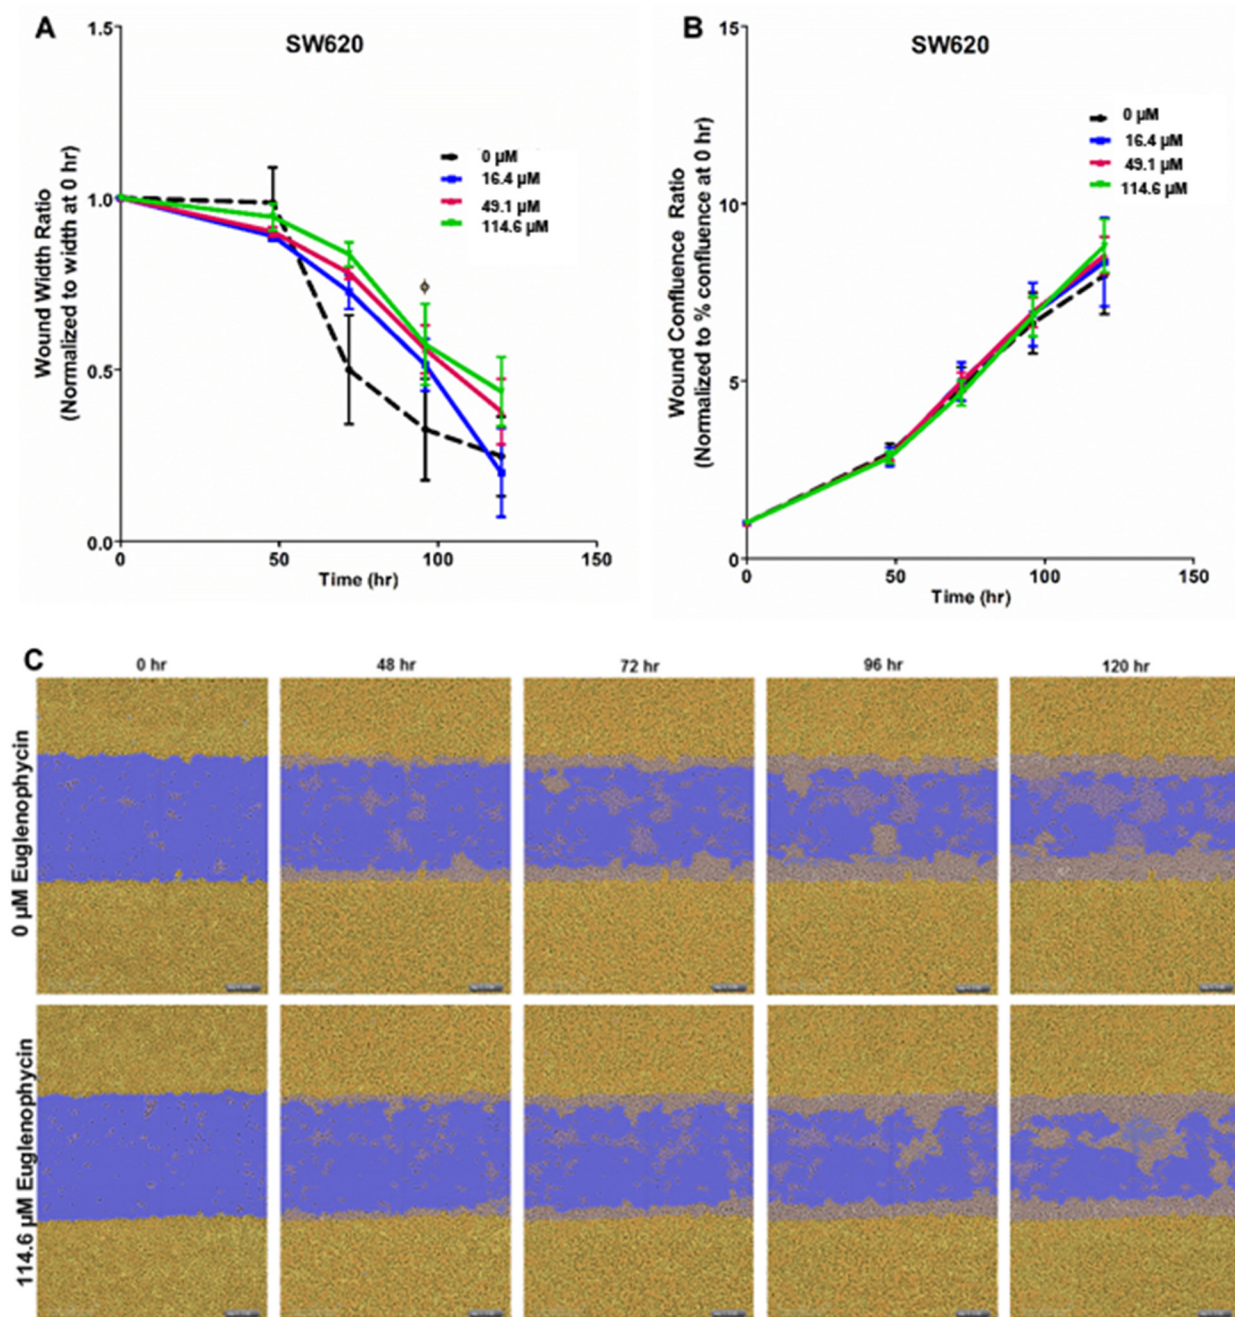

**Supplementary Figure 6: Effect of euglenophycin on migration of SW620 cells.** (A-B) Quantified wound width and confluence; (C) scratch assay representative images. Regions are color coded as follows: wound area (blue), non-migrating cells (golden yellow), migrating cells that populate the wound (light brown).

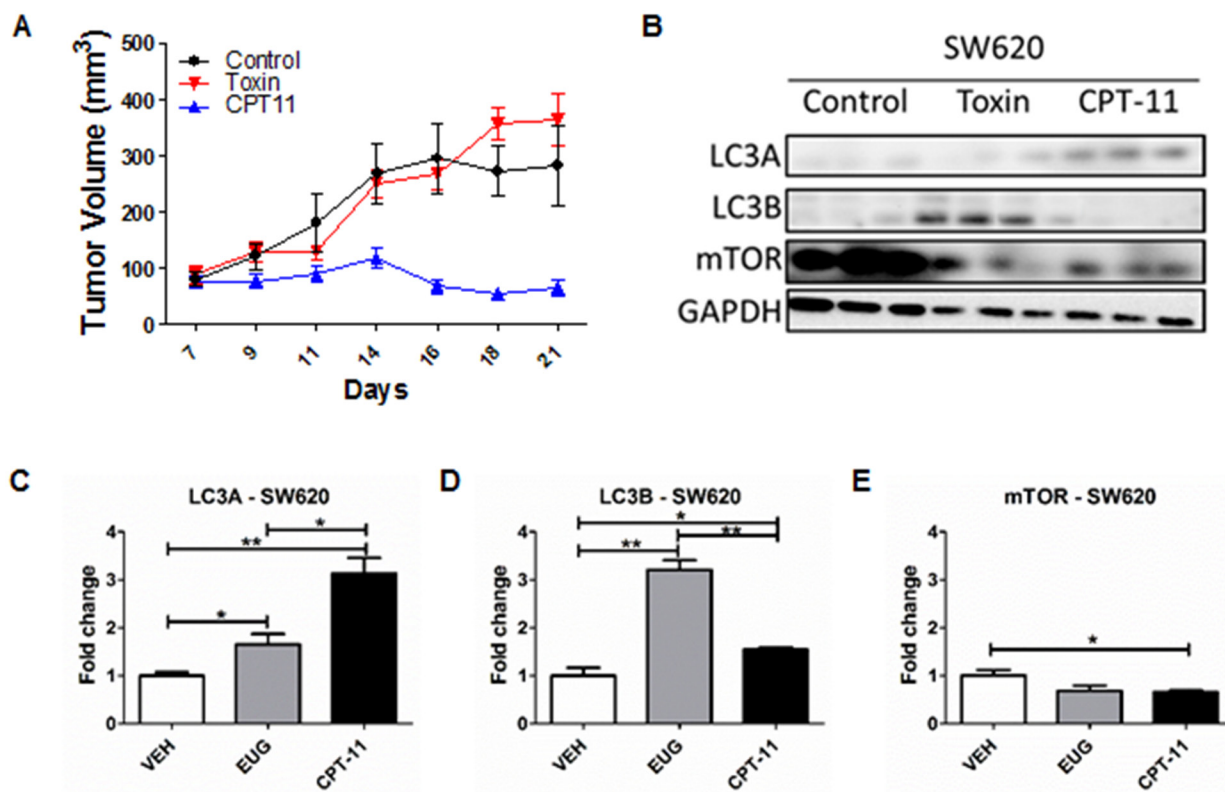

**Supplementary Figure 7: Measurement of tumor growth and autophagy markers in SW620 mouse colorectal cancer xenografts treated with either euglenophycin or CPT-11.** (A) Tumor measurements (values indicate mean ± SD) and protein expression of autophagy markers in (B), representative western blot image and quantification in (C-E) (values indicate mean ± SE). \*p ≤ 0.05 and \*\*p ≤ 0.001.

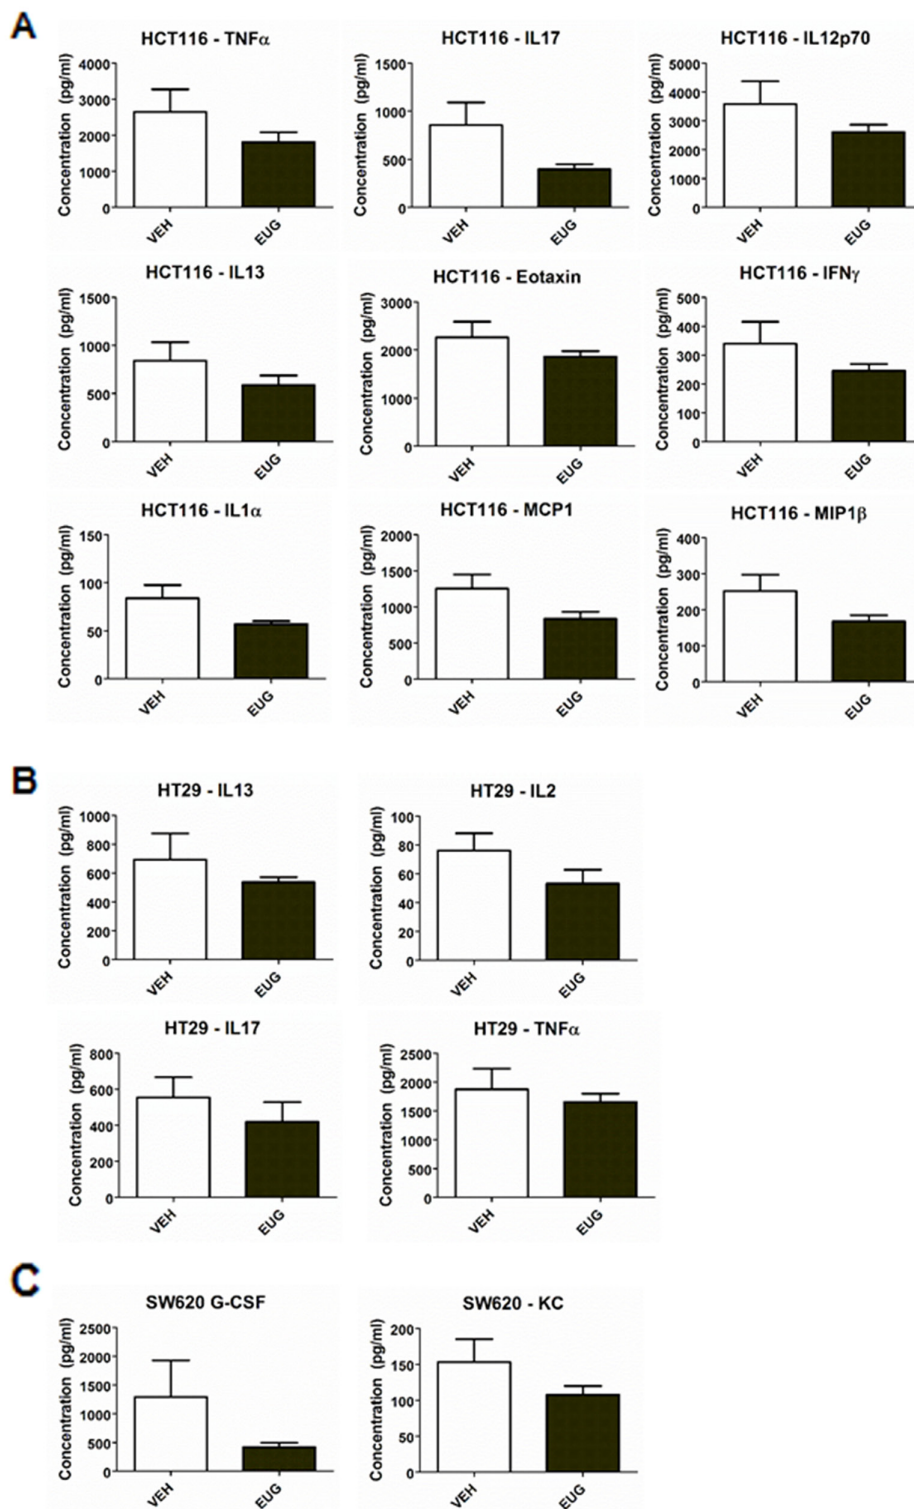

**Supplementary Figure 8: Euglenophycin differentially affected *in vivo* serum levels of multiple cytokines/chemokines depending on cell type.** Representative graphs of several cytokines/chemokines decreased in (A) HCT116; (B) HT29, and (C) SW620 xenografts.



### IEC-6

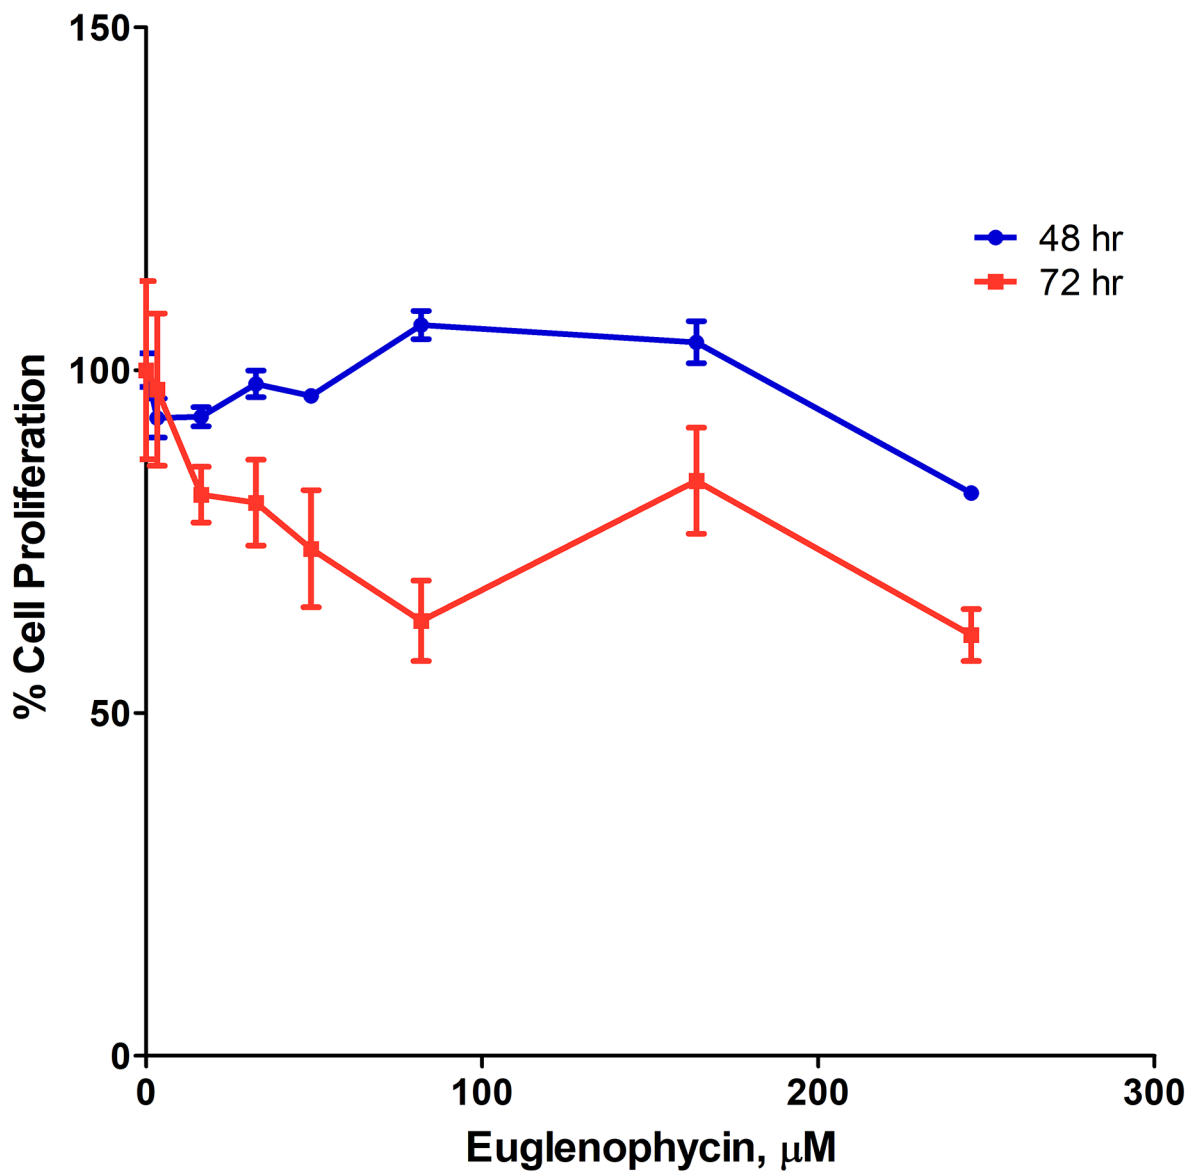

Supplementary Figure 9: Effects of euglenophycin on the proliferation of IEC-6 “normal” rat intestinal epithelial cells.

Supplementary Table 1: Primers used for qRT-PCR targeting autophagy markers and *Gapdh*

| Target gene  | Primer Code  | Sequence (5' – 3')     |
|--------------|--------------|------------------------|
| <i>Gapdh</i> | FH2_GAPDH    | ctttgcgtcgccag         |
|              | RH2_GAPDH    | ttgatggcaacaatatccac   |
| <i>Lc3a</i>  | FH1_MAP1LC3A | agaaaggattttgaggagg    |
|              | RH1_MAP1LC3A | ttcatctgcaaaactgagac   |
| <i>Lc3b</i>  | FH1_MAP1LC3B | atagaacgatacaagggtgag  |
|              | RH1_MAP1LC3B | ctgtaagegccttctaattatc |
| <i>Becn1</i> | FH1_BECN1    | cagtatcagagagaatacagtg |
|              | RH1_BECN1    | tggaaggttcattaaagac    |
| <i>Atg5</i>  | FH3_ATG5     | tgtatgaaagaagctgatgc   |
|              | RH3_ATG5     | tgtcattttgcaatcccac    |
| <i>Atg12</i> | FH1_ATG12    | ctctctatgagtgttttggc   |
|              | RH1_ATG12    | cacatctgtaagtctcttgc   |
